# Supplementary material
Source: PubMed Central journal article supplement (PMC8851878)
Supplement: NIHMS1758221-supplement-1.pdf [file NIHMS1758221-supplement-1.pdf]

**SUPPLEMENTAL MATERIAL**

**Supplemental figure 1. Trends of types of fat intake from 1990 to 2010 in two prospective cohorts (means in grams per day)**

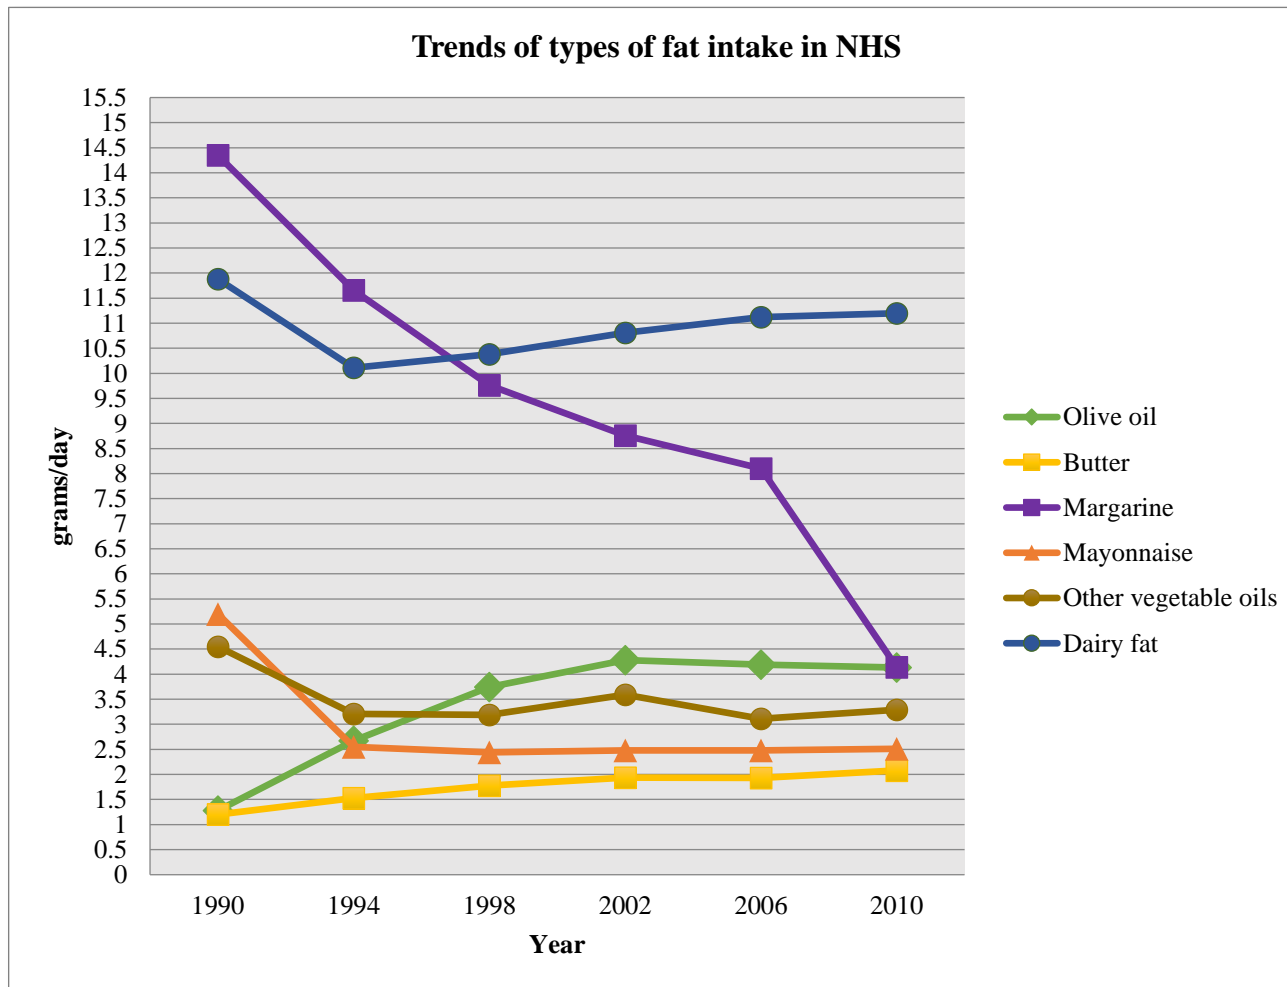

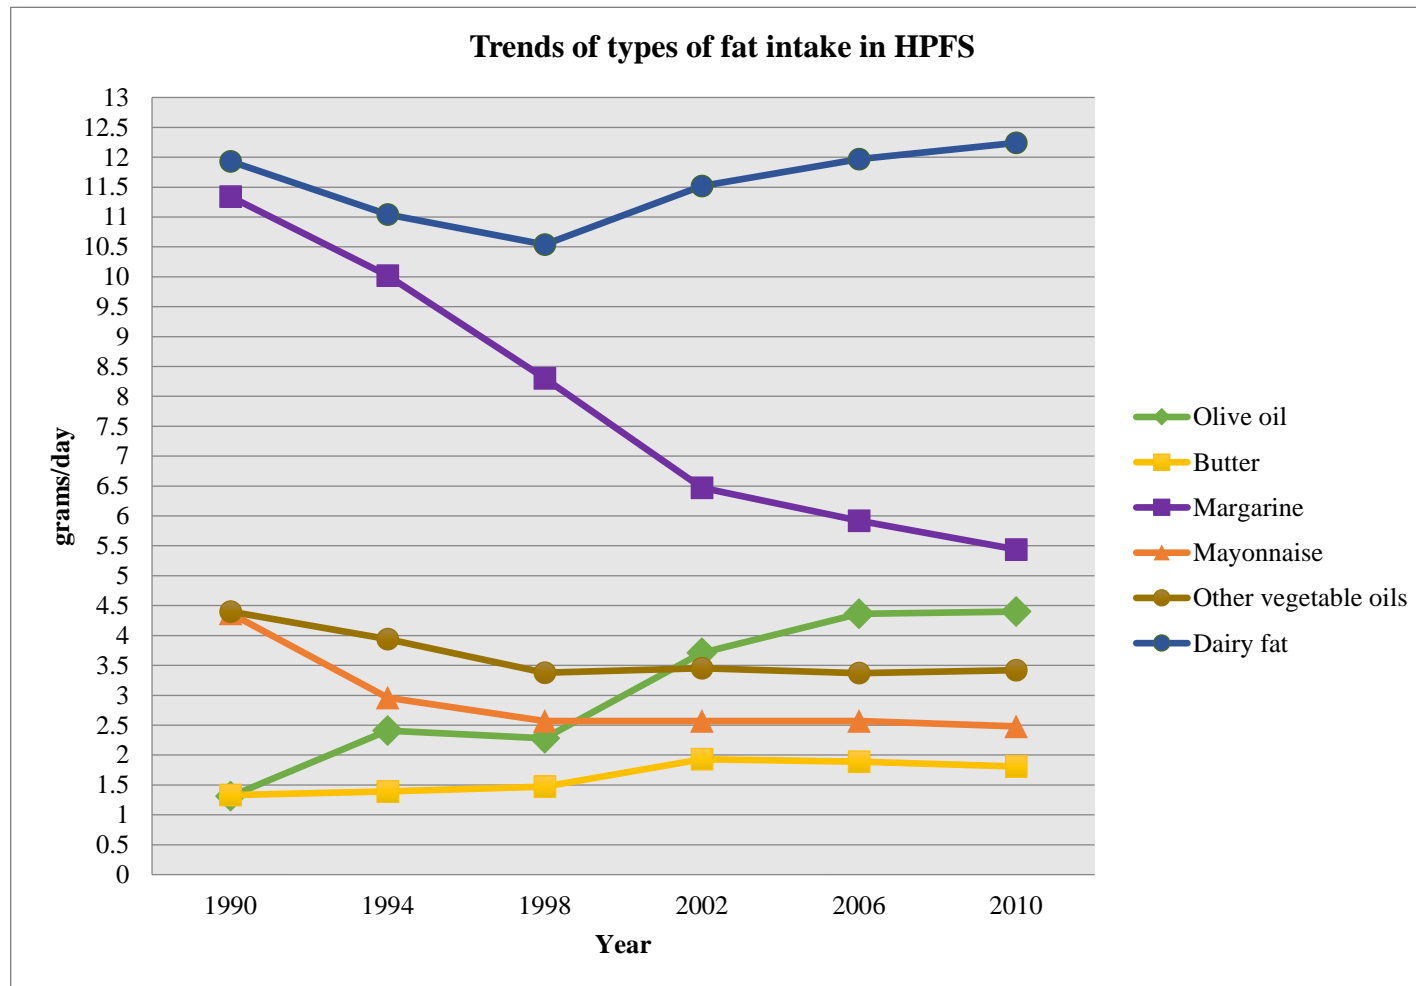

| <b>Supplemental Table 1. Nutritional composition of olive oil and other types of fat.</b>                                                                                                                                 |          |           |               |                     |                     |            |               |                      |                  |
|---------------------------------------------------------------------------------------------------------------------------------------------------------------------------------------------------------------------------|----------|-----------|---------------|---------------------|---------------------|------------|---------------|----------------------|------------------|
|                                                                                                                                                                                                                           | Calories | Total fat | Saturated fat | Monounsaturated fat | Polyunsaturated fat | Oleic acid | Linoleic acid | Alpha-linolenic acid | Arachidonic acid |
| Olive oil                                                                                                                                                                                                                 | 885      | 100       | 13.7          | 72.8                | 10.4                | 71.3       | 9.7           | 0.6                  | 0                |
| Mayonnaise                                                                                                                                                                                                                | 680      | 74.8      | 11.7          | 16.8                | 44.7                | 16.4       | 39.1          | 5.5                  | 0.05             |
| Margarine                                                                                                                                                                                                                 | 500      | 57.4      | 10.6          | 14.2                | 17.87               | 16.4       | 14.5          | 3.4                  | 0                |
| Butter                                                                                                                                                                                                                    | 717      | 81.1      | 51.4          | 21.0                | 3.0                 | 19.9       | 2.7           | 0.3                  | 0                |
| Corn oil                                                                                                                                                                                                                  | 900      | 100       | 12.9          | 27.5                | 54.6                | 27.3       | 53.5          | 1.1                  | 0                |
| Soybean oil                                                                                                                                                                                                               | 900      | 100       | 32.9          | 22                  | 45.3                | 18.9       | 39.7          | 5.5                  | 0                |
| Safflower oil                                                                                                                                                                                                             | 885      | 100       | 6.2           | 14.4                | 74.6                | 14.4       | 74/6          | 0                    | 0                |
| Canola oil                                                                                                                                                                                                                | 885      | 100       | 7.3           | 63.3                | 28.2                | 61.7       | 19.1          | 9.1                  | 0                |
| Nutritional composition per 100g of oils and fats using Harvard University Food Composition Database ( <a href="https://regepi.bwh.harvard.edu/health/nutrition/">https://regepi.bwh.harvard.edu/health/nutrition/.</a> ) |          |           |               |                     |                     |            |               |                      |                  |

| <b>Supplemental Table 2. Categories for causes of death</b> |                           |                           |
|-------------------------------------------------------------|---------------------------|---------------------------|
| Cause of death                                              | ICD-8 code                | ICD-9 code                |
| Cardiovascular disease                                      | 390-458                   | 390-459                   |
| Heart disease                                               | 390-429, 440-458          | 390-429, 440-459          |
| Stroke                                                      | 430-438                   | 430-438                   |
| Cancer                                                      | 140-207                   | 140-208                   |
| Colorectal cancer                                           | 153,154                   | 153,154                   |
| Lung cancer                                                 | 162                       | 162                       |
| Pancreatic cancer                                           | 157                       | 157                       |
| Breast cancer                                               | 174                       | 174                       |
| Ovary cancer                                                | 183                       | 183                       |
| Prostate cancer                                             | 185                       | 185                       |
| Respiratory disease                                         | 460-519                   | 460-519                   |
| Neurodegenerative disease                                   | 290, 340, 342, 348        | 290, 331, 332, 335, 340   |
| All other causes                                            | The rest of the ICD codes | The rest of the ICD codes |

| <b>Supplemental Table 3.</b> Spearman correlations between olive oil intake and other types of fat. |                  |                  |               |                   |                             |                  |                           |
|-----------------------------------------------------------------------------------------------------|------------------|------------------|---------------|-------------------|-----------------------------|------------------|---------------------------|
| <b>NHS</b>                                                                                          |                  |                  |               |                   |                             |                  |                           |
|                                                                                                     | <b>Olive oil</b> | <b>Margarine</b> | <b>Butter</b> | <b>Mayonnaise</b> | <b>Other vegetable oils</b> | <b>Dairy fat</b> | <b>All other diet fat</b> |
| <b>Olive oil</b>                                                                                    | 1                |                  |               |                   |                             |                  |                           |
| <b>Margarine</b>                                                                                    | -0.05*           | 1                |               |                   |                             |                  |                           |
| <b>Butter</b>                                                                                       | 0.09*            | -0.31*           | 1             |                   |                             |                  |                           |
| <b>Mayonnaise</b>                                                                                   | -0.06*           | 0.09*            | -0.04*        | 1                 |                             |                  |                           |
| <b>Other vegetable oils</b>                                                                         | 0.006            | 0.07*            | 0.008*        | 0.77*             | 1                           |                  |                           |
| <b>Dairy fat</b>                                                                                    | -0.05*           | -0.11*           | 0.36*         | 0.04*             | -0.03*                      | 1                |                           |
| <b>HPFS</b>                                                                                         |                  |                  |               |                   |                             |                  |                           |
| <b>Olive oil</b>                                                                                    | 1                |                  |               |                   |                             |                  |                           |
| <b>Margarine</b>                                                                                    | -0.19*           | 1                |               |                   |                             |                  |                           |
| <b>Butter</b>                                                                                       | 0.20*            | -0.21*           | 1             |                   |                             |                  |                           |
| <b>Mayonnaise</b>                                                                                   | -0.03*           | 0.19*            | 0.15*         | 1                 |                             |                  |                           |
| <b>Other vegetable oils</b>                                                                         | -0.08*           | 0.19*            | 0.07*         | 0.70*             | 1                           |                  |                           |
| <b>Dairy fat</b>                                                                                    | 0.05*            | 0.05*            | 0.45*         | 0.28*             | 0.23*                       | 1                |                           |
| NHS, Nurses' Health Study; HPFS, Health Professionals Follow-up Study; *, <i>P</i> value <0.001.    |                  |                  |               |                   |                             |                  |                           |

**Supplemental Table 4. Hazard Ratios and 95% CI for other causes of death**

|                       |                        | Never or <1<br>per month | >0–≤4.5 g/d<br>(>0 to ≤1 teaspoon) | >4.5–≤ 7 g/d<br>>1 teaspoon to ≤1/2<br>TBS) | >7 g/d<br>(>1/2<br>TBS) | <i>P</i> for trend | HR (95% CI)<br>for 5 g increase<br>in olive oil<br>intake |
|-----------------------|------------------------|--------------------------|------------------------------------|---------------------------------------------|-------------------------|--------------------|-----------------------------------------------------------|
| <b>NHS</b>            | N° cases/ Person-years | 2268/527372              | 2185/603179                        | 418/117489                                  | 716/238877              |                    |                                                           |
|                       | Age-adjusted model 1   | 1 (Ref.)                 | 0.80 (0.75, 0.86)                  | 0.75 (0.68, 0.84)                           | 0.63 (0.57, 0.68)       | <.0001             | 0.89 (0.87, 0.92)                                         |
|                       | Multivariable model 2  | 1 (Ref.)                 | 0.94 (0.88, 1.00)                  | 0.90 (0.81, 1.00)                           | 0.79 (0.72, 0.87)       | <.0001             | 0.94 (0.92, 0.96)                                         |
|                       | Multivariable model 3  | 1 (Ref.)                 | 0.95 (0.89, 1.01)                  | 0.91 (0.82, 1.01)                           | 0.80 (0.73, 0.88)       | <.0001             | 0.94 (0.92, 0.97)                                         |
| <b>HPFS</b>           | N° cases/ Person-years | 487/276475               | 386/312247                         | 73/58426                                    | 118/103937              |                    |                                                           |
|                       | Age-adjusted model 1   | 1 (Ref.)                 | 0.81 (0.76, 0.87)                  | 0.76 (0.67, 0.86)                           | 0.73 (0.66, 0.80)       | <.0001             | 0.93 (0.90, 0.96)                                         |
|                       | Multivariable model 2  | 1 (Ref.)                 | 0.96 (0.89, 1.03)                  | 0.89 (0.79, 1.01)                           | 0.91 (0.82, 1.01)       | 0.07               | 0.97 (0.94, 1.00)                                         |
|                       | Multivariable model 3  | 1 (Ref.)                 | 0.98 (0.91, 1.05)                  | 0.92 (0.81, 1.05)                           | 0.95 (0.85, 1.06)       | 0.31               | 0.98 (0.95, 1.01)                                         |
| <b>Pooled model 1</b> |                        | 1 (Ref.)                 | 0.81 (0.77, 0.84)                  | 0.75 (0.69, 0.82)                           | 0.67 (0.62, 0.71)       | <.0001             | 0.91 (0.89, 0.92)                                         |
| <b>Pooled model 2</b> |                        | 1 (Ref.)                 | 0.95 (0.91, 1.00)                  | 0.90 (0.83, 0.98)                           | 0.85 (0.80, 0.92)       | <.0001             | 0.95 (0.93, 0.97)                                         |
| <b>Pooled model 3</b> |                        | 1 (Ref.)                 | 0.96 (0.92, 1.01)                  | 0.91 (0.84, 0.99)                           | 0.87 (0.82, 0.94)       | <.0001             | 0.96 (0.94, 0.98)                                         |

Results are expressed as Hazard Ratios (HR) and 95% Confidence Intervals (95% CI). Abbreviations: NHS, Nurses' Health Study, HPFS, Health Professionals Follow-up Study. Model 2 was adjusted for age (years), ethnicity (white, non-white), Southern European/Mediterranean ancestry (yes, no), married (yes/no), living alone (yes/no), smoking status (never, former, current smoker 1-14 cigarettes per day, 15-24 cigarettes per day, or ≥ 25 cigarettes per day), alcohol intake (0, 0.1-4.9, 5.0-9.9, 10.0-14.9, and ≥ 15.0 g/d), physical activity (<3.0, 3.0-8.9, 9.0-17.9, 18.0-26.9, ≥27.00 metabolic equivalent task-h/week), family history of diabetes (yes/no), family history of myocardial infarction (yes/no), family history of cancer (yes/no), history of hypertension (yes/no), history of hypercholesterolemia (yes/no), multivitamin use (yes/no), aspirin use (yes/no), in women postmenopausal status and menopausal hormone use [premenopausal, postmenopausal (no, past, or current hormone use), total energy intake (kilocalories per day) and body mass index (calculated as weight in kilograms divides by height in meters squared). Model 3 was additionally adjusted for red meat, fruits and vegetables, nuts, soda, whole grains intake (in quintiles), and trans fat. Results were pooled using a pooled dataset and stratifying by cohort (sex) and time period.

**Supplemental 5. Hazard Ratios (95% CI) of total and cause-specific mortality according to categories of total olive oil intake adjusting for additional socioeconomic factors**

|                                                | Categories of olive oil intake |                                    |                                             |                         | <i>P</i> for trend | HR (95% CI)<br>for 5 g increase<br>in olive oil<br>intake |
|------------------------------------------------|--------------------------------|------------------------------------|---------------------------------------------|-------------------------|--------------------|-----------------------------------------------------------|
|                                                | Never or<br><1 per<br>month    | >0–≤4.5 g/d<br>(>0 to ≤1 teaspoon) | >4.5–≤ 7 g/d<br>>1 teaspoon to ≤1/2<br>TBS) | >7 g/d<br>(>1/2<br>TBS) |                    |                                                           |
| <b>TOTAL MORTALITY</b>                         | 1 (Ref.)                       | 0.88 (0.86, 0.90)                  | 0.86 (0.83, 0.90)                           | 0.81 (0.78, 0.84)       | <0.001             | 0.96 (0.95, 0.97)                                         |
| <b>CARDIOVASCULAR DISEASE<br/>MORTALITY</b>    | 1 (Ref.)                       | 0.83 (0.79, 0.87)                  | 0.77 (0.70, 0.84)                           | 0.81 (0.76, 0.88)       | <0.001             | 0.97 (0.95, 0.99)                                         |
| <b>CANCER MORTALITY</b>                        | 1 (Ref.)                       | 0.85 (0.81, 0.89)                  | 0.94 (0.86, 1.02)                           | 0.83 (0.78, 0.89)       | 0.001              | 0.97 (0.95, 0.99)                                         |
| <b>NEURODEGENERATIVE DISEASE<br/>MORTALITY</b> | 1 (Ref.)                       | 0.88 (0.83, 0.94)                  | 0.89 (0.79, 0.99)                           | 0.73 (0.66, 0.80)       | <.0001             | 0.92 (0.90, 0.95)                                         |
| <b>RESPIRATORY DISEASE<br/>MORTALITY</b>       | 1 (Ref.)                       | 0.95 (0.88, 1.04)                  | 0.89 (0.76, 1.03)                           | 0.83 (0.73, 0.94)       | 0.004              | 0.95 (0.91, 0.98)                                         |

*Results for both cohorts pooled. Results are expressed as Hazard Ratios (HR) and 95% Confidence Intervals (95% CI). Abbreviations: NHS, Nurses' Health Study, HPFS, Health Professionals Follow-up Study. Model was adjusted for age (years), ethnicity (white, non-white), Southern European/Mediterranean ancestry (yes, no), married (yes/no), living alone (yes/no), smoking status (never, former, current smoker 1-14 cigarettes per day, 15-24 cigarettes per day, or ≥ 25 cigarettes per day), alcohol intake (0, 0.1-4.9, 5.0-9.9, 10.0-14.9, and ≥ 15.0 g/d), physical activity (<3.0, 3.0-8.9, 9.0-17.9, 18.0-26.9, ≥27.00 metabolic equivalent task-h/week), family history of diabetes (yes/no), family history of myocardial infarction (yes/no), family history of cancer (yes/no), history of hypertension (yes/no), history of hypercholesterolemia (yes/no), multivitamin use (yes/no), aspirin use (yes/no), in women postmenopausal status and menopausal hormone use [premenopausal, postmenopausal (no, past, or current hormone use), total energy intake (kilocalories per day) and body mass index (calculated as weight in kilograms divides by height in meters squared, for red meat, fruits and vegetables, nuts, soda, whole grains intake (in quintiles), trans fat, census-based neighbourhood median family income, median home value, and percentage with college degree. Results were pooled using a pooled dataset and stratifying by cohort (sex) and time period.*

**Supplemental 6. Hazard Ratios (95% CI) of total and cause-specific mortality according to categories of total olive oil intake adjusting for AHEI**

|                                            |                     | Categories of olive oil intake |                                    |                                            |                         | <i>P</i> for trend | HR (95% CI) for<br>5 g increase in<br>olive oil intake |
|--------------------------------------------|---------------------|--------------------------------|------------------------------------|--------------------------------------------|-------------------------|--------------------|--------------------------------------------------------|
|                                            |                     | Never or <1<br>per month       | >0–≤4.5 g/d<br>(>0 to ≤1 teaspoon) | >4.5–≤7 g/d<br>>1 teaspoon to ≤1/2<br>TBS) | >7 g/d<br>(>1/2<br>TBS) |                    |                                                        |
| <b>TOTAL MORTALITY</b>                     |                     |                                |                                    |                                            |                         |                    |                                                        |
| <b>NHS</b>                                 | Multivariable model | 1 (Ref.)                       | 0.87 (0.85, 0.90)                  | 0.87 (0.82, 0.92)                          | 0.81 (0.77, 0.84)       | <0.001             | 0.96 (0.95, 0.97)                                      |
| <b>HPFS</b>                                | Multivariable model | 1 (Ref.)                       | 0.92 (0.88, 0.95)                  | 0.90 (0.84, 0.96)                          | 0.87 (0.82, 0.92)       | <0.001             | 0.97 (0.96, 0.99)                                      |
| <b>Pooled model</b>                        |                     | 1 (Ref.)                       | 0.88 (0.86, 0.91)                  | 0.87 (0.84, 0.91)                          | 0.82 (0.79, 0.85)       | <0.001             | 0.96 (0.95, 0.97)                                      |
| <b>CARDIOVASCULAR DISEASE MORTALITY</b>    |                     |                                |                                    |                                            |                         |                    |                                                        |
| <b>NHS</b>                                 | Multivariable model | 1 (Ref.)                       | 0.82 (0.77, 0.88)                  | 0.74 (0.65, 0.84)                          | 0.86 (0.78, 0.95)       | 0.01               | 0.99 (0.96, 1.01)                                      |
| <b>HPFS</b>                                | Multivariable model | 1 (Ref.)                       | 0.84 (0.78, 0.90)                  | 0.83 (0.73, 0.94)                          | 0.81 (0.73, 0.91)       | <0.001             | 0.97 (0.94, 1.00)                                      |
| <b>Pooled model</b>                        |                     | 1 (Ref.)                       | 0.83 (0.79, 0.87)                  | 0.78 (0.71, 0.85)                          | 0.83 (0.77, 0.90)       | <0.001             | 0.98 (0.96, 1.00)                                      |
| <b>CANCER MORTALITY</b>                    |                     |                                |                                    |                                            |                         |                    |                                                        |
| <b>NHS</b>                                 | Multivariable model | 1 (Ref.)                       | 0.85 (0.79, 0.90)                  | 0.98 (0.88, 1.08)                          | 0.85 (0.78, 0.93)       | 0.06               | 0.98 (0.96, 1.01)                                      |
| <b>HPFS</b>                                | Multivariable model |                                | 0.89 (0.82, 0.96)                  | 0.92 (0.81, 1.05)                          | 0.83 (0.74, 0.93)       | 0.01               | 0.95 (0.92, 0.99)                                      |
| <b>Pooled model</b>                        |                     | 1 (Ref.)                       | 0.86 (0.82, 0.90)                  | 0.95 (0.87, 1.03)                          | 0.84 (0.78, 0.90)       | 0.002              | 0.97 (0.95, 0.99)                                      |
| <b>NEURODEGENERATIVE DISEASE MORTALITY</b> |                     |                                |                                    |                                            |                         |                    |                                                        |
| <b>NHS</b>                                 | Multivariable model | 1 (Ref.)                       | 0.83 (0.77, 0.89)                  | 0.89 (0.77, 1.00)                          | 0.67 (0.60, 0.76)       | <.0001             | 0.91 (0.88, 0.94)                                      |
| <b>HPFS</b>                                | Multivariable model | 1 (Ref.)                       | 1.03 (0.90, 1.16)                  | 0.99 (0.79, 1.25)                          | 0.94 (0.78, 1.15)       | 0.51               | 0.98 (0.93, 1.03)                                      |

|                                      |                     |          |                   |                   |                   |        |                   |
|--------------------------------------|---------------------|----------|-------------------|-------------------|-------------------|--------|-------------------|
| <b>Pooled model</b>                  |                     | 1 (Ref.) | 0.95 (0.89, 1.00) | 0.96 (0.86, 1.08) | 0.80 (0.72, 0.89) | 0.0003 | 0.93 (0.89, 0.96) |
| <b>RESPIRATORY DISEASE MORTALITY</b> |                     |          |                   |                   |                   |        |                   |
| <b>NHS</b>                           | Multivariable model | 1 (Ref.) | 0.96 (0.86, 1.06) | 0.89 (0.73, 1.08) | 0.84 (0.71, 0.99) | 0.04   | 0.93 (0.88, 0.98) |
| <b>HPFS</b>                          | Multivariable model | 1 (Ref.) | 0.99 (0.86, 1.13) | 0.93 (0.72, 1.20) | 0.92 (0.74, 1.14) | 0.38   | 0.98 (0.92, 1.04) |
| <b>Pooled model</b>                  |                     | 1 (Ref.) | 0.96 (0.89, 1.04) | 0.90 (0.77, 1.05) | 0.86 (0.75, 0.98) | 0.01   | 0.95 (0.92, 0.99) |
| <b>OTHER DEATHS</b>                  |                     |          |                   |                   |                   |        |                   |
| <b>NHS</b>                           | Multivariable model | 1 (Ref.) | 0.96 (0.90, 1.03) | 0.89 (0.79, 1.01) | 0.84 (0.76, 0.93) | 0.0005 | 0.96 (0.93, 0.99) |
| <b>HPFS</b>                          | Multivariable model | 1 (Ref.) | 0.98 (0.91, 1.05) | 0.93 (0.82, 1.06) | 0.96 (0.87, 1.07) | 0.42   | 0.99 (0.96, 1.02) |
| <b>Pooled model</b>                  |                     | 1 (Ref.) | 0.96 (0.92, 1.01) | 0.92 (0.84, 1.00) | 0.87 (0.81, 0.93) | <.0001 | 0.96 (0.94, 0.98) |

*Results are expressed as Hazard Ratios (HR) and 95% Confidence Intervals (95% CI). Abbreviations: NHS, Nurses' Health Study, HPFS, Health Professionals Follow-up Study. Model 2 was adjusted for age (years), ethnicity (white, non-white), married (yes/no), living alone (yes/no), Southern European/Mediterranean ancestry (yes, no), smoking status (never, former, current smoker 1-14 cigarettes per day, 15-24 cigarettes per day, or  $\geq 25$  cigarettes per day), alcohol intake (0, 0.1-4.9, 5.0-9.9, 10.0-14.9, and  $\geq 15.0$  g/d), physical activity (<3.0, 3.0-8.9, 9.0-17.9, 18.0-26.9,  $\geq 27.00$  metabolic equivalent task-h/week), family history of diabetes (yes/no), family history of myocardial infarction (yes/no), family history of cancer (yes/no), history of hypertension (yes/no), history of hypercholesterolemia (yes/no), multivitamin use (yes/no), aspirin use (yes/no), in women postmenopausal status and menopausal hormone use [premenopausal, postmenopausal (no, past, or current hormone use), total energy intake (kilocalories per day) and body mass index (calculated as weight in kilograms divides by height in meters squared). Model 3 was additionally adjusted for AHEI (excluding polyunsaturated fatty acids and alcohol). Results were pooled using a pooled dataset and stratifying by cohort (sex) and time period.*



**Supplemental Table 7. Hazard Ratios (95% CI) of total and cause-specific mortality according to categories of cumulative average of olive oil intake**

|                                            | Categories of olive oil intake |                                    |                                             |                         | <i>P</i> for trend | HR (95% CI)<br>for 5 g increase<br>in olive oil<br>intake |
|--------------------------------------------|--------------------------------|------------------------------------|---------------------------------------------|-------------------------|--------------------|-----------------------------------------------------------|
|                                            | Never or <1<br>per month       | >0–≤4.5 g/d<br>(>0 to ≤1 teaspoon) | >4.5–≤ 7 g/d<br>>1 teaspoon to ≤1/2<br>TBS) | >7 g/d<br>(>1/2<br>TBS) |                    |                                                           |
| <b>TOTAL MORTALITY</b>                     |                                |                                    |                                             |                         |                    |                                                           |
| <b>Pooled model 1</b>                      | 1 (Ref.)                       | 0.77 (0.75, 0.79)                  | 0.71 (0.68, 0.74)                           | 0.64 (0.62, 0.67)       | <0.001             | 0.88 (0.86, 0.89)                                         |
| <b>Pooled model 2</b>                      | 1 (Ref.)                       | 0.89 (0.87, 0.91)                  | 0.87 (0.83, 0.91)                           | 0.82 (0.78, 0.85)       | <0.001             | 0.94 (0.93, 0.96)                                         |
| <b>Pooled model 3</b>                      | 1 (Ref.)                       | 0.90 (0.88, 0.92)                  | 0.88 (0.84, 0.92)                           | 0.82 (0.79, 0.86)       | <0.001             | 0.95 (0.93, 0.96)                                         |
| <b>CARDIOVASCULAR DISEASE MORTALITY</b>    |                                |                                    |                                             |                         |                    |                                                           |
| <b>Pooled model 1</b>                      | 1 (Ref.)                       | 0.70 (0.67, 0.74)                  | 0.67 (0.61, 0.73)                           | 0.64 (0.59, 0.69)       | <0.001             | 0.89 (0.86, 0.91)                                         |
| <b>Pooled model 2</b>                      | 1 (Ref.)                       | 0.80 (0.76, 0.84)                  | 0.82 (0.75, 0.90)                           | 0.82 (0.76, 0.89)       | 0.002              | 0.97 (0.94, 0.99)                                         |
| <b>Pooled model 3</b>                      | 1 (Ref.)                       | 0.81 (0.77, 0.85)                  | 0.83 (0.75, 0.90)                           | 0.81 (0.75, 0.88)       | 0.002              | 0.96 (0.94, 0.99)                                         |
| <b>CANCER MORTALITY</b>                    |                                |                                    |                                             |                         |                    |                                                           |
| <b>Pooled model 1</b>                      | 1 (Ref.)                       | 0.81 (0.78, 0.85)                  | 0.79 (0.72, 0.85)                           | 0.77 (0.72, 0.83)       | <0.001             | 0.94 (0.91, 0.96)                                         |
| <b>Pooled model 2</b>                      | 1 (Ref.)                       | 0.88 (0.84, 0.92)                  | 0.88 (0.81, 0.95)                           | 0.86 (0.80, 0.93)       | 0.01               | 0.97 (0.94, 1.00)                                         |
| <b>Pooled model 3</b>                      | 1 (Ref.)                       | 0.89 (0.85, 0.93)                  | 0.90 (0.83, 0.98)                           | 0.89 (0.83, 0.97)       | 0.10               | 0.98 (0.95, 1.01)                                         |
| <b>NEURODEGENERATIVE DISEASE MORTALITY</b> |                                |                                    |                                             |                         |                    |                                                           |
| <b>Pooled model 1</b>                      | 1 (Ref.)                       | 0.74 (0.69, 0.78)                  | 0.68 (0.61, 0.76)                           | 0.55 (0.49, 0.61)       | <.0001             | 0.83 (0.80, 0.86)                                         |
| <b>Pooled model 2</b>                      | 1 (Ref.)                       | 0.95 (0.89, 1.00)                  | 0.96 (0.86, 1.08)                           | 0.80 (0.72, 0.88)       | <.0001             | 0.93 (0.89, 0.96)                                         |
| <b>Pooled model 3</b>                      | 1 (Ref.)                       | 0.93 (0.87, 0.99)                  | 0.93 (0.83, 1.04)                           | 0.75 (0.67, 0.84)       | <.0001             | 0.92 (0.88, 0.95)                                         |
| <b>RESPIRATORY DISEASE MORTALITY</b>       |                                |                                    |                                             |                         |                    |                                                           |
| <b>Pooled model 1</b>                      | 1 (Ref.)                       | 0.78 (0.72, 0.85)                  | 0.70 (0.61, 0.82)                           | 0.57 (0.49, 0.65)       | <0.001             | 0.81 (0.77, 0.86)                                         |
| <b>Pooled model 2</b>                      | 1 (Ref.)                       | 0.87 (0.80, 0.95)                  | 0.83 (0.71, 0.97)                           | 0.68 (0.58, 0.79)       | <.0001             | 0.87 (0.82, 0.92)                                         |

Guasch-Ferré et al. Consumption of olive oil and risk of total and cause-specific mortality

---

|                       |          |                   |                   |                   |       |                   |
|-----------------------|----------|-------------------|-------------------|-------------------|-------|-------------------|
| <b>Pooled model 3</b> | 1 (Ref.) | 0.92 (0.85, 1.00) | 0.92 (0.79, 1.08) | 0.76 (0.65, 0.88) | 0.002 | 0.91 (0.86, 0.96) |
|-----------------------|----------|-------------------|-------------------|-------------------|-------|-------------------|

---

*Results are expressed as Hazard Ratios (HR) and 95% Confidence Intervals (95% CI). Abbreviations: NHS, Nurses' Health Study, HPFS, Health Professionals Follow-up Study. Model 2 was adjusted for age (years), ethnicity (white, non-white), Southern European/Mediterranean ancestry (yes, no), married (yes/no), living alone (yes/no), smoking status (never, former, current smoker 1-14 cigarettes per day, 15-24 cigarettes per day, or  $\geq 25$  cigarettes per day), alcohol intake (0, 0.1-4.9, 5.0-9.9, 10.0-14.9, and  $\geq 15.0$  g/d), physical activity (<3.0, 3.0-8.9, 9.0-17.9, 18.0-26.9,  $\geq 27.00$  metabolic equivalent task-h/week), family history of diabetes (yes/no), family history of myocardial infarction (yes/no), family history of cancer (yes/no), history of hypertension (yes/no), history of hypercholesterolemia (yes/no), multivitamin use (yes/no), aspirin use (yes/no), in women postmenopausal status and menopausal hormone use [premenopausal, postmenopausal (no, past, or current hormone use), total energy intake (kilocalories per day) and body mass index (calculated as weight in kilograms divides by height in meters squared). Model 3 was additionally adjusted for red meat, fruits and vegetables, nuts, soda, whole grains intake (in quintiles), and trans fat. Results were pooled using a pooled dataset and stratifying by cohort (sex) and time period. Using cumulative average of olive oil intake since 1990.*

---

**Supplemental 8. Hazard Ratios (95% CI) of total and cause-specific mortality according to categories of olive oil intake mutually adjusting for other types of dietary fats**

|                                                | Categories of olive oil intake |                                    |                                             |                         | <i>P</i> for trend | HR (95% CI)<br>for 5 g increase<br>in olive oil<br>intake |
|------------------------------------------------|--------------------------------|------------------------------------|---------------------------------------------|-------------------------|--------------------|-----------------------------------------------------------|
|                                                | Never or<br><1 per<br>month    | >0–≤4.5 g/d<br>(>0 to ≤1 teaspoon) | >4.5–≤ 7 g/d<br>>1 teaspoon to ≤1/2<br>TBS) | >7 g/d<br>(>1/2<br>TBS) |                    |                                                           |
| <b>TOTAL MORTALITY</b>                         | 1 (Ref.)                       | 0.88 (0.85, 0.90)                  | 0.85 (0.81, 0.89)                           | 0.79 (0.76, 0.82)       | <0.001             | 0.94 (0.93, 0.95)                                         |
| <b>CARDIOVASCULAR DISEASE<br/>MORTALITY</b>    | 1 (Ref.)                       | 0.84 (0.80, 0.89)                  | 0.77 (0.70, 0.85)                           | 0.82 (0.76, 0.89)       | 0.008              | 0.96 (0.93, 0.99)                                         |
| <b>CANCER MORTALITY</b>                        | 1 (Ref.)                       | 0.84 (0.80, 0.89)                  | 0.91 (0.84, 0.99)                           | 0.81 (0.76, 0.88)       | 0.06               | 0.97 (0.94, 1.00)                                         |
| <b>NEURODEGENERATIVE DISEASE<br/>MORTALITY</b> | 1 (Ref.)                       | 0.87 (0.82, 0.93)                  | 0.88 (0.78, 0.99)                           | 0.70 (0.64, 0.78)       | <.0001             | 0.92 (0.89, 0.94)                                         |
| <b>RESPIRATORY DISEASE<br/>MORTALITY</b>       | 1 (Ref.)                       | 0.94 (0.86, 1.02)                  | 0.84 (0.71, 0.99)                           | 0.78 (0.68, 0.89)       | <.0001             | 0.88 (0.83, 0.94)                                         |

*Results for both cohorts pooled. Results are expressed as Hazard Ratios (HR) and 95% Confidence Intervals (95% CI). Abbreviations: NHS, Nurses' Health Study, HPFS, Health Professionals Follow-up Study. Model was adjusted for age (years), ethnicity (white, non-white), Southern European/Mediterranean ancestry (yes, no), married (yes/no), living alone (yes/no), smoking status (never, former, current smoker 1-14 cigarettes per day, 15-24 cigarettes per day, or ≥ 25 cigarettes per day), alcohol intake (0, 0.1-4.9, 5.0-9.9, 10.0-14.9, and ≥ 15.0 g/d), physical activity (<3.0, 3.0-8.9, 9.0-17.9, 18.0-26.9, ≥27.00 metabolic equivalent task-h/week), family history of diabetes (yes/no), family history of myocardial infarction (yes/no), family history of cancer (yes/no), history of hypertension (yes/no), history of hypercholesterolemia (yes/no), multivitamin use (yes/no), aspirin use (yes/no), in women postmenopausal status and menopausal hormone use [premenopausal, postmenopausal (no, past, or current hormone use), total energy intake (kilocalories per day) and body mass index (calculated as weight in kilograms divides by height in meters squared, for red meat, fruits and vegetables, nuts, soda, whole grains intake (in quintiles), trans fat and mutually adjusted for other types of dietary fat (mayonnaise, margarine, dairy fat and other plant oils). Results were pooled using a pooled dataset and stratifying by cohort (sex) and time period.*

**Supplemental 9. Hazard Ratios (95% CI) of cause-specific mortality according to categories of total olive oil intake applying a competing-risk regression model**

|                                                | Categories of olive oil intake |                                    |                                             |                         | <i>P</i> for trend | HR (95% CI)<br>for 5 g increase<br>in olive oil<br>intake |
|------------------------------------------------|--------------------------------|------------------------------------|---------------------------------------------|-------------------------|--------------------|-----------------------------------------------------------|
|                                                | Never or<br><1 per<br>month    | >0–≤4.5 g/d<br>(>0 to ≤1 teaspoon) | >4.5–≤ 7 g/d<br>>1 teaspoon to ≤1/2<br>TBS) | >7 g/d<br>(>1/2<br>TBS) |                    |                                                           |
| <b>CARDIOVASCULAR DISEASE<br/>MORTALITY</b>    | 1 (Ref.)                       | 0.90 (0.86, 0.95)                  | 1.01 (0.93, 1.09)                           | 0.91 (0.86, 0.98)       | 0.08               | 0.99 (0.97, 1.00)                                         |
| <b>CANCER MORTALITY</b>                        | 1 (Ref.)                       | 0.83 (0.79, 0.87)                  | 0.77 (0.70, 0.84)                           | 0.80 (0.75, 0.86)       | <.001              | 0.96 (0.94, 0.98)                                         |
| <b>NEURODEGENERATIVE DISEASE<br/>MORTALITY</b> | 1 (Ref.)                       | 0.78 (0.74, 0.83)                  | 0.80 (0.72, 0.89)                           | 0.66 (0.60, 0.72)       | <.0001             | 0.91 (0.88, 0.93)                                         |
| <b>RESPIRATORY DISEASE<br/>MORTALITY</b>       | 1 (Ref.)                       | 0.92 (0.84, 0.99)                  | 0.84 (0.72, 0.97)                           | 0.77 (0.68, 0.87)       | <.0001             | 0.93 (0.89, 0.96)                                         |
| <b>OTHER CAUSES OF DEATH</b>                   | 1 (Ref.)                       | 0.95 (0.90, 0.99)                  | 0.86 (0.80, 0.94)                           | 0.83 (0.77, 0.88)       | <.0001             | 0.95 (0.94, 0.97)                                         |

*Results for both cohorts pooled. Results are expressed as Hazard Ratios (HR) and 95% Confidence Intervals (95% CI). Abbreviations: NHS, Nurses' Health Study, HPFS, Health Professionals Follow-up Study. Model was adjusted for age (years), ethnicity (white, non-white), Southern European/Mediterranean ancestry (yes, no), married (yes/no), living alone (yes/no), smoking status (never, former, current smoker 1-14 cigarettes per day, 15-24 cigarettes per day, or ≥ 25 cigarettes per day), alcohol intake (0, 0.1-4.9, 5.0-9.9, 10.0-14.9, and ≥ 15.0 g/d), physical activity (<3.0, 3.0-8.9, 9.0-17.9, 18.0-26.9, ≥27.00 metabolic equivalent task-h/week), family history of diabetes (yes/no), family history of myocardial infarction (yes/no), family history of cancer (yes/no), history of hypertension (yes/no), history of hypercholesterolemia (yes/no), multivitamin use (yes/no), aspirin use (yes/no), in women postmenopausal status and menopausal hormone use [premenopausal, postmenopausal (no, past, or current hormone use), total energy intake (kilocalories per day) and body mass index (calculated as weight in kilograms divides by height in meters squared, for red meat, fruits and vegetables, nuts, soda, whole grains intake (in quintiles), trans fat, census-based neighbourhood median family income, median home value, and percentage with college degree. Results were pooled using a pooled dataset and stratifying by cohort (sex) and time period. We applied a competing-risk regression model for cause-specific mortality by including olive oil as the exposure and other risk factors as an unconstrained covariate, allowing the effects of the covariates to vary across cause-specific mortality.*



| <b>Supplemental Table 10. Hazard Ratios and 95% CI for all-cause and cause-specific mortality associated with olive oil substituted for other fats</b> |                        |                      |                         |                                            |                              |
|--------------------------------------------------------------------------------------------------------------------------------------------------------|------------------------|----------------------|-------------------------|--------------------------------------------|------------------------------|
|                                                                                                                                                        | <b>Total mortality</b> | <b>CVD mortality</b> | <b>Cancer mortality</b> | <b>Neurodegenerative disease mortality</b> | <b>Respiratory mortality</b> |
| <b>Olive oil for margarine</b>                                                                                                                         | 0.87 (0.85, 0.89)      | 0.90 (0.86, 0.94)    | 0.89 (0.85, 0.93)       | 0.88 (0.82, 0.94)                          | 0.85 (0.78, 0.92)            |
| <b>Olive oil for butter</b>                                                                                                                            | 0.86 (0.83, 0.88)      | 0.93 (0.87, 0.99)    | 0.91 (0.86, 0.95)       | 0.92 (0.85, 1.00)                          | 0.80 (0.72, 0.88)            |
| <b>Olive oil for mayonnaise</b>                                                                                                                        | 0.81 (0.78, 0.84)      | 0.84 (0.77, 0.92)    | 0.86 (0.80, 0.93)       | 0.80 (0.72, 0.90)                          | 0.66 (0.58, 0.77)            |
| <b>Olive oil for other vegetable oils</b>                                                                                                              | 1.00 (0.95, 1.06)      | 1.08 (0.97, 1.21)    | 0.96 (0.86, 1.06)       | 0.92 (0.85, 1.00)                          | 1.11 (0.92, 1.35)            |
| <b>Olive oil for dairy fat</b>                                                                                                                         | 0.87 (0.84, 0.89)      | 0.92 (0.87, 0.97)    | 0.91 (0.87, 0.96)       | 0.83 (0.77, 0.89)                          | 0.77 (0.70, 0.84)            |

*Hazard ratios for total and cause-specific mortality among study participants substituting 10 g of olive for equivalent amount of other dietary fats. Abbreviations: NHS, Nurses' Health Study, HPFS, Health Professionals Follow-up Study. Model was adjusted for age (years), ethnicity (white, non-white), Southern European/Mediterranean ancestry (yes, no), married (yes/no), living alone (yes/no), smoking status (never, former, current smoker 1-14 cigarettes per day, 15-24 cigarettes per day, or ≥ 25 cigarettes per day), alcohol intake (0, 0.1-4.9, 5.0-9.9, 10.0-14.9, and ≥ 15.0 g/d), physical activity (<3.0, 3.0-8.9, 9.0-17.9, 18.0-26.9, ≥27.00 metabolic equivalent task-h/week), family history of diabetes (yes/no), family history of myocardial infarction (yes/no), family history of cancer (yes/no), multivitamin use (yes/no), aspirin use (yes/no), in women postmenopausal status and menopausal hormone use [premenopausal, postmenopausal (no, past, or current hormone use), total energy intake (kilocalories per day) and body mass index (calculated as weight in kilograms divides by height in meters squared). Model 3 was additionally adjusted for the consumption of red meat, fruits and vegetables, nuts, soda, whole grains (in quintiles), and the intake of trans fat, and mutually adjusted for the intake of other types of fat. Results were pooled using a pooled dataset and stratifying by cohort (sex) and time period.*
